# Supplementary material
Source: Springer Nature journal article supplement (https://www.springermedizin.de/resource/supplementary/12885_2008_1569_MOESM10_ESM.pdf/9472344)
Supplement: MOESM10 [file 9472344]

| Gene name | Treatment |    |
|-----------|-----------|----|
|           | EGF       | ST |
| CAV1      | +         | -  |
| CD24      | +         | NC |
| EGFR      | +         | -  |
| EPHB4     | NC        | +  |
| NLF1      | NC        | +  |
| NLF2      | NC        | +  |
| CD44      | +         | -  |
| CDH5      | +         | -  |
| CLDN1     | +         | -  |
| CTGF      | ++        | -- |
| CYR61     | +         | -  |
| KRT7      | +         | -  |
| LGALS1    | +         | -  |
| S100A4    | +         | -  |

“+” or “-” denotes whether genes were predominantly induced or repressed over 72h treatment. “NC” - no change.

Table 2
